# Supplementary material for: 1% defect enriches MoS2 quantum dot: catalysis and blue luminescence
Source: Royal Society of Chemistry journal article supplement (doi:10.1039/c9nr07612c), 2019-12-02
Supplement: c9nr07612c1.pdf [file c9nr07612c1.pdf]

## Electronic Supplementary Information

1% defect enriches MoS<sub>2</sub> quantum dots:  
catalysis and blue luminescence

Jingmin Tang,<sup>a</sup> Masanori Sakamoto,<sup>a</sup> Haruhisa Ohta,<sup>a</sup> Ken-ichi Saitow<sup>a,b,\*</sup>

<sup>a</sup> Department of Chemistry, Graduate School of Science, Hiroshima University,  
1-3-1 Kagamiyama, Higashi-Hiroshima 739-8526, Japan

<sup>b</sup> Department of Materials Science, Natural Science Center for Basic Research and Development,  
1-3-1 Kagamiyama, Higashi-Hiroshima 739-8526, Japan

## 1. Supporting Figures

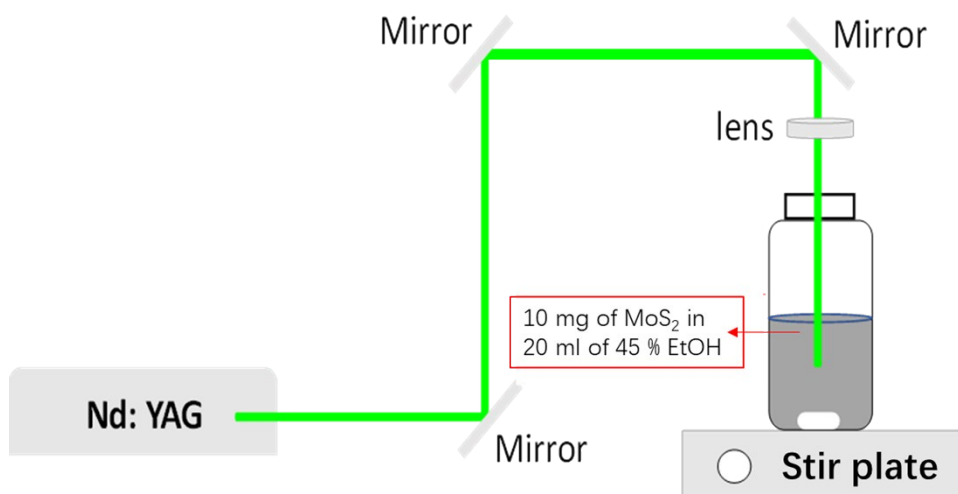

**Fig. S1** MoS<sub>2</sub> QDs synthesis by PLA in the binary solvent.

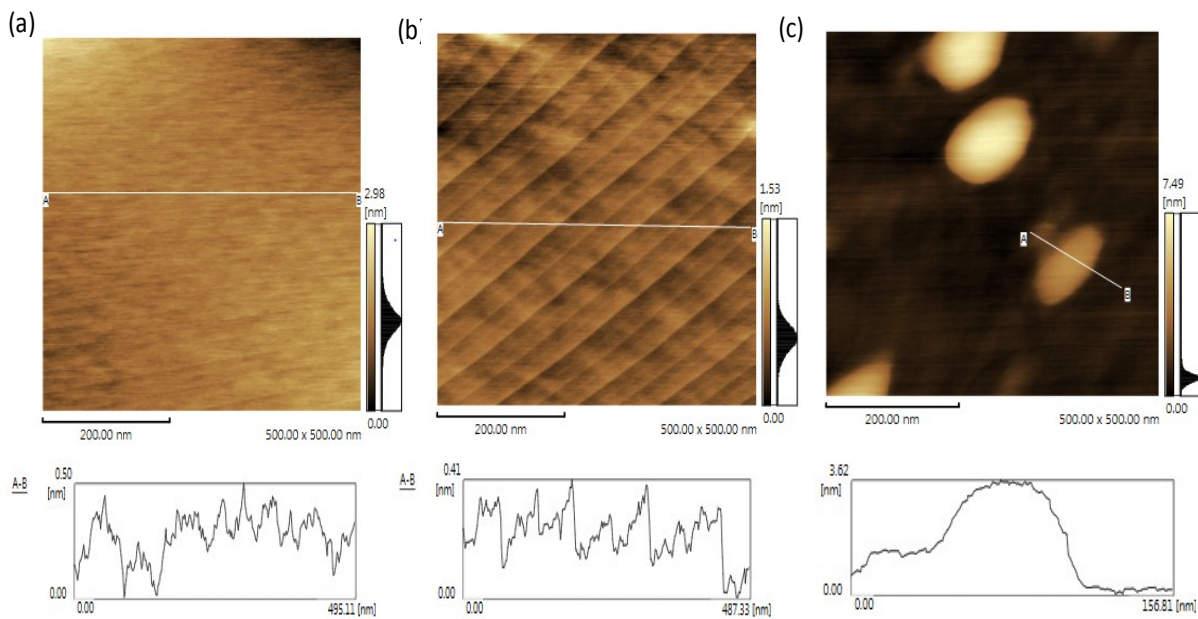

**Fig. S2** AFM images of (a) silicon wafer, (b) binary solvent dropped on the silicon wafer and dried, and (c) MoS<sub>2</sub> QDs dissolved in the binary solvent dropped on the silicon wafer and dried.

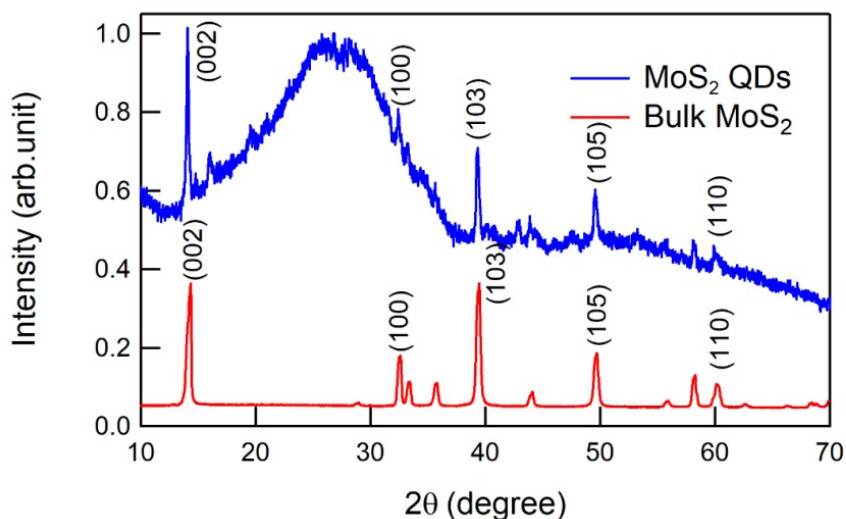

**Fig. S3** XRD patterns of the MoS<sub>2</sub> QDs prepared by PLAL (blue) and bulk MoS<sub>2</sub> (red). These Miller indices are attributed to those of ref. 1. The data indicates that MoS<sub>2</sub> is crystalline. The broad diffraction at around 25 degree is due to the sample holder made of low reflection silicon.

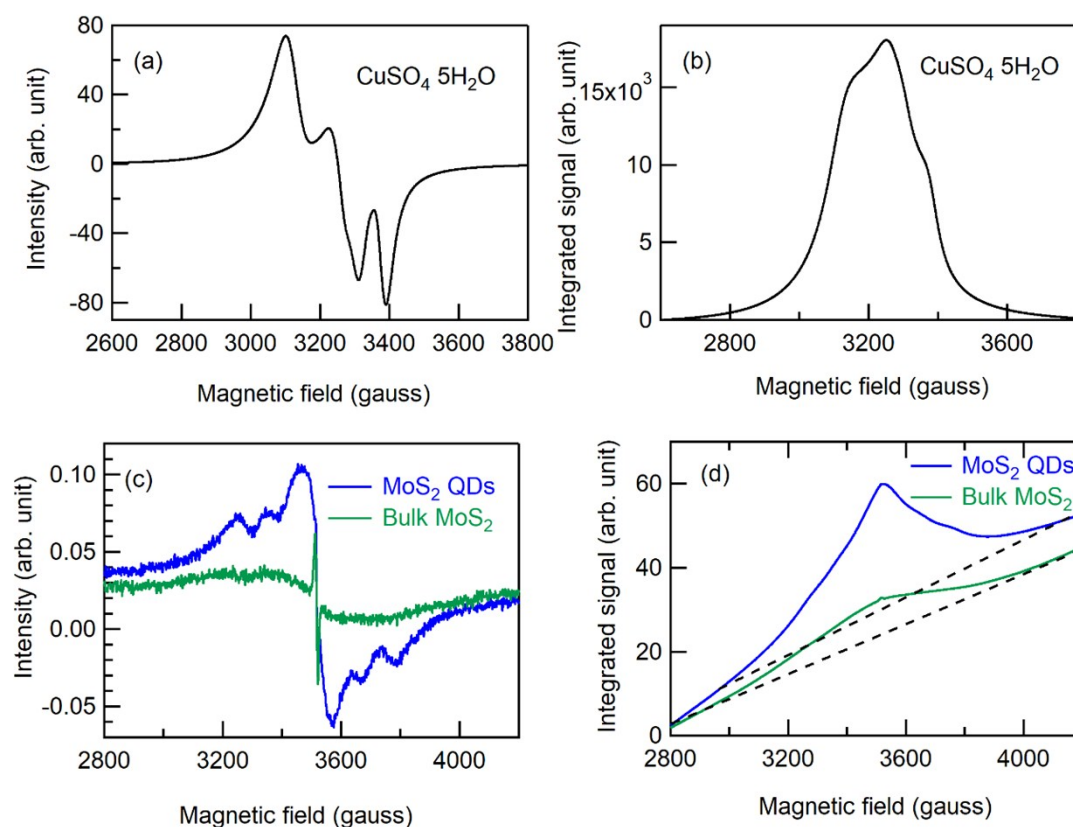

**Fig. S4** ESR spectra of (a) CuSO<sub>4</sub>•5H<sub>2</sub>O as a standard sample to estimate spin density and (c) MoS<sub>2</sub> QDs (blue) and bulk MoS<sub>2</sub> (green). Integrated profiles of ESR spectra of (b) CuSO<sub>4</sub>•5H<sub>2</sub>O and (d) MoS<sub>2</sub> QDs (blue) and bulk MoS<sub>2</sub> (green). Spin density, sulfur vacancy density, is estimated from the area of sample (d) divided by that of standard (b). Under the same molar amount between sample and standard, sulfur vacancies of MoS<sub>2</sub> QDs and bulk MoS<sub>2</sub> are obtained as 0.97 % and 0.16 %, respectively, indicating the percentage of vacancies in all of sulfur atoms involved in those MoS<sub>2</sub>



## 2. Size effect of the absorption of 2D MoS<sub>2</sub>

It has been well known that semiconductor materials show the quantum confinement effect, which increases the band gap energy ( $E_g$ ), as its size, i.e. quantum dot (QD), approaches to the Bohr radius of exciton.<sup>2,3</sup> The experimental data for the size effect of QD prepared from a 3D semiconductor, e.g. CdSe, have been well characterized.<sup>4</sup> As for the quantum confinement effect on the 2D layer materials, it has been described by the confinement along  $z$ -axis as eqs. (1) and (2).<sup>5-8</sup>

$$E_g^* = E_g + \Delta E_g \quad (1)$$

$$\Delta E_g = \frac{\hbar^2 \pi^2}{2\mu L_z^2} \quad (2)$$

where  $E_g^*$  is the band gap energy of a 2D layer material,  $E_g$  the band gap energy of a 2D bulk material,  $\Delta E_g$  the increased amount due to the quantum confinement effect,  $\hbar$  the Dirac constant,  $\mu$  reduced mass of exciton,  $L_z$  the layer thickness along  $z$ -direction, based on the effective mass approximation. Figure S6a shows the results of four bands of MoS<sub>2</sub> calculated from eqs. (1) and (2); reduced mass  $\mu$  was used as a reported value of  $\mu = 0.18m_0$ ,<sup>8</sup> where  $m_0$  is the electron rest mass. However, the calculated data deviate from the experimental ones, as shown in Fig. S6b. Such a deviation has been observed in various systems of 2D nanomaterials.<sup>5-8</sup> One of the reasons for their deviations seems to be due to dimensionality, i.e. how an anisotropic structure of 2D materials is treated in 0 or 1 D materials such as a QD, quantum wire, and cluster. Figure S6b shows the size vs.  $E_g^*$  by reproducing well-defined experimental data of MoS<sub>2</sub> clusters as a function of size (diameter)<sup>8</sup> (see Figs. 5 and 8 in ref.8). The data

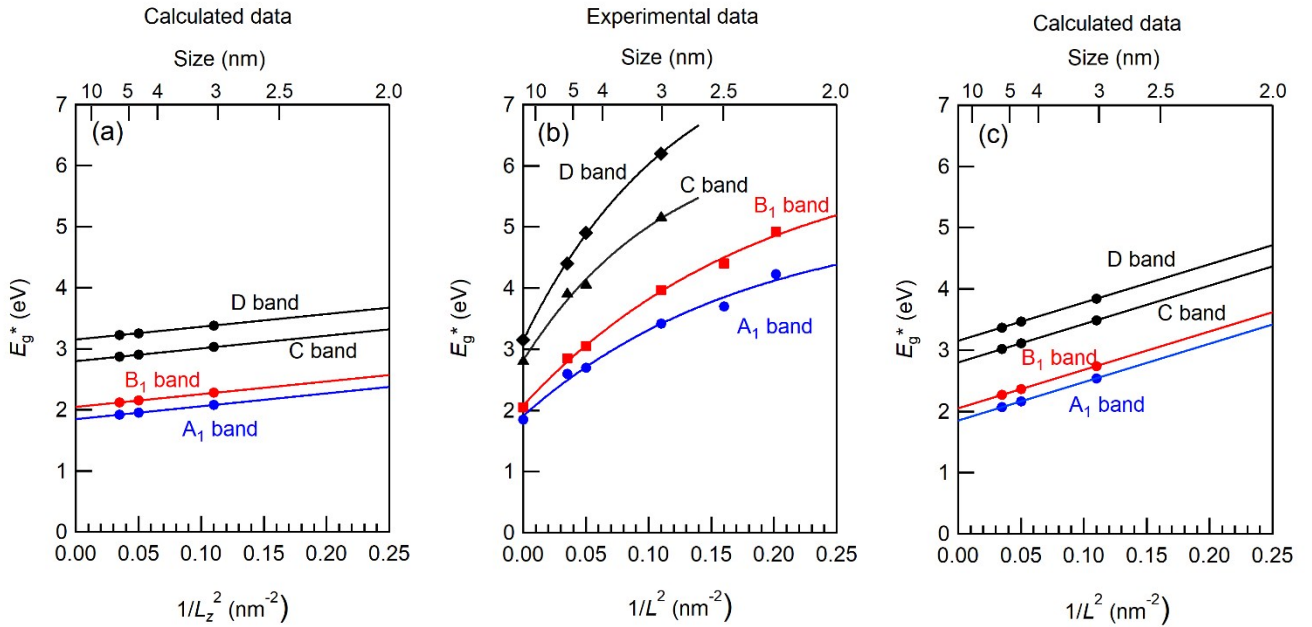

**Fig. S6** Changes of band gap energies due to quantum confinement effects of MoS<sub>2</sub> QD of (a) calculated data using eqs. (1) and (2) and (b) experimental data reproduced from Fig. 8 in ref. 8. (c) calculated data using  $E_g^* = E_g + 3\Delta E_g$ . Sizes,  $L$ , in (a), (b), and (c) denote the thickness of MoS<sub>2</sub> layer, the diameter of MoS<sub>2</sub> cluster, and a side length of MoS<sub>2</sub> nanocubic.

indicates significant size dependence of  $E_g^*$ . According to eq. (2), the calculated  $E_g$  is linearly proportional to the

$1/L_z^2$ , whereas the experimental data show nonlinear profile. In addition, the amount of  $\Delta E_g$  is significantly larger in the experimental data. As for another case, we examined  $E_g^* = E_g + 3\Delta E_g$ , if MoS<sub>2</sub> QD would confine the exciton as an isotropic in  $x$ -,  $y$ -,  $z$ - directions, as shown in Fig. S6c. This enhances the change of  $E_g^*$ , but the calculated values are smaller than those of experimental data. Therefore, the experimental data become crucial to characterize the quantum confinement effect of 2D QDs. Studies on a theoretical research to characterize 2D QDs will be important to understand the quantum confinement effect of anisotropic QDs.

## References

1. T. Oztas, H. S. Sen, E. Durgun, B. Ortac, *J. Phys. Chem. C*, 2014, **118**, 30120.
2. V. B. Sandomirskii, *Sov. Phys. JETP*, 1967, **25**, 101.
3. M. Fox, *Optical Properties of Solids (Oxford Master Series in Condensed Matter Physics)* 2nd Edition, Oxford University Press.
4. a) A. M. Smith, S. Nie, *Account. Chem. Res.* 2010, **43**, 190, b) Y. Wang, N. Herron, *J. Phys. Chem.* 1991, **95**, 2, 525.
5. F. Consador, R.F. Frindt, *Phys. Rev. B.* 1970, **2**, 4893.;
6. A. D. Yoffe, *Adv. Phys.* 1993, **42**, 173.
7. G. Liu, C. Zhen, Y. Kang, L. Wang, H. Cheng, *Chem. Soc. Rev.*, 2018, **47**, 6410.
8. J. P. Wilcoxon, P. P. Newcomer, G. A. Samara, *J. Appl. Phys.* 1997, **81**, 15.
